# Supplementary material for: Dynamic Formation of Asexual Diploid and Polyploid Lineages: Multilocus Analysis of Cobitis Reveals the Mechanisms Maintaining the Diversity of Clones
Source: PubMed Central journal article supplement (PMC3447977; doi:10.1371/journal.pone.0045384), 2012-09-20
Supplement: pone.0045384.s002.pdf [file pone.0045384.s002.pdf]

**Table S1. Locality information, IDs and in Fig. 1C.**

| Locality ID | River            | Odra R. subbasin  | Locality name     | Latitude | Longitude | Date       |
|-------------|------------------|-------------------|-------------------|----------|-----------|------------|
| 0501        | Strzałka         | Widawa            | Bukowa Śląska     | 51° 06'  | 17° 49'   | 18.4.2005  |
| 0502        | Oława            | Oława             | Marcinkowice      | 50° 59'  | 17° 13'   | 19.4.2005  |
| 0503        | Smortawa         | Smortawa          | Janików           | 50° 59'  | 17° 22'   | 19.4.2005  |
| 0506        | Budkowiczanka    | Stobrawa          | Okoły             | 50° 52'  | 17° 56'   | 20.4.2005  |
| 0507        | Budkowiczanka    | Stobrawa          | Zagwińdzie        | 50° 52'  | 18° 02'   | 22.4.2005  |
| 0508        | Dziewicza Struga | Kaczawa           | Szczytniki Małe   | 51° 15'  | 16° 16'   | 21.4.2005  |
| 0509        | Wierzbiak        | Kaczawa           | Kunice            | 51° 14'  | 16° 14'   | 21.4.2005  |
| 0510        | Skora            | Kaczawa           | Grzymalin         | 51° 17'  | 16° 05'   | 21.4.2005  |
| 0511        | Sumina           | Ruda              | Sumina            | 50° 09'  | 18° 24'   | 22.4.2005  |
| 0513        | Ślesiński Canal  | Warta             | Żółwiniec         | 52° 25'  | 18° 21'   | 29.9.2005  |
| 0515        | Odra             | -                 | Frankfurt am Oder | 52° 20'  | 14° 33'   | 17.11.2005 |
| 0601        | Odra             | -                 | Czerna            | 51° 43'  | 15° 54'   | 4.9.2006   |
| 0602        | Czarna           | Rudna             | Czerńczyce        | 51° 37'  | 16° 13'   | 4.9.2006   |
| 0603        | Zimnica          | direct Odra basin | Niemstów          | 51° 22'  | 16° 17'   | 5.9.2006   |
| 0604        | Krzycki Rów      | direct Odra basin | Kierzno           | 51° 45'  | 15° 55'   | 5.9.2006   |
| 0606        | Ołobok Canal     | direct Odra basin | Nietkowice        | 52° 04'  | 15° 22'   | 6.9.2006   |
| 0607        | Krzeciński Canal | direct Odra basin | Krzesin           | 52° 05'  | 14° 45'   | 7.9.2006   |
| 0608        | Odra             | -                 | Czarnowo          | 52° 03'  | 14° 57'   | 7.9.2006   |
| 0701        | Barycz           | Barycz            | Ryczeń            | 51° 36'  | 16° 30'   | 13.6.2007  |
| 0702        | Rudna            | Rudna             | Retków            | 51° 36'  | 16° 12'   | 14.6.2007  |
| 0703        | Rudna            | Rudna             | Głogów            | 51° 38'  | 16° 09'   | 14.6.2007  |
| 0705        | Odra             | -                 | Wietszyce         | 51° 38'  | 16° 18'   | 15.6.2007  |
| 0706        | Odra             | -                 | Ciechłowice       | 51° 29'  | 16° 27'   | 10.8.2007  |
| 0801        | Polska Woda      | Barycz            | Wielgie Milickie  | 51° 31'  | 17° 30'   | 22.9.2008  |
| 0804        | Widawa           | Widawa            | Kielczów          | 51° 07'  | 17° 10'   | 24.9.2008  |
| 0901        | Odra             | -                 | Kostrzyn          | 25° 36'  | 14° 36'   | 24.4.2009  |
| 0903        | Odra             | -                 | Ratowice          | 51° 01'  | 17° 16'   | 24.8.2009  |
