# Supplementary material for: Dynamic Formation of Asexual Diploid and Polyploid Lineages: Multilocus Analysis of Cobitis Reveals the Mechanisms Maintaining the Diversity of Clones
Source: PubMed Central journal article supplement (PMC3447977; doi:10.1371/journal.pone.0045384), 2012-09-20
Supplement: pone.0045384.s004.pdf [file pone.0045384.s004.pdf]

**Table S3. Summary of the locality ID (like in Fig. 1 c), microsatellite data, ploidy level, genomic composition and MLGs of individuals in the study; (\* - uncertain genom quantity).**

| Sample name | Locality ID | Microsatellite locus |              |          |           |          |              |              |          |              |           | Ploidy | Genomic composition | MLG |
|-------------|-------------|----------------------|--------------|----------|-----------|----------|--------------|--------------|----------|--------------|-----------|--------|---------------------|-----|
|             |             | cota_006             | cota_010     | cota_027 | cota_032  | cota_033 | cota_037     | cota_041     | cota_068 | cota_093     | cota_111  |        |                     |     |
| HZ050102    | 0501        | 313351353            | 138170188    | 302302   | 212232    | 211223   | 277296       | 330376       | 199211   | 303311345    | 218220258 | 3n     | EET                 | 1t  |
| HZ050104    | 0501        | 313351353            | 138170188    | 302302   | 212232    | 211223   | 277296       | 330376       | 199211   | 303311345    | 218220258 | 3n     | EET                 | 1t  |
| HZ050103    | 0501        | 313351353            | 138170188    | 302302   | 212232    | 211223   | 277280296    | 330376       | 199211   | 303311345    | 218220258 | 3n     | EET                 | 2t  |
| HZ05015     | 0501        | 353357               | 138164170188 | 302302   | 212232    | 223223   | 263271       | 330330       | 199211   | 303311313345 | 218220258 | 4n     | EEET                | 1te |
| HZ050105    | 0501        | 313342351353         | 164178       | n.a.     | 212212    | 211223   | 276277296    | 330330       | 211211   | 309313       | 218218    | 4n     | EEET                | 2te |
| HZ05021     | 0502        | 313351               | 138188       | 307307   | 212232    | 211235   | 277296       | 330376       | 199211   | 311345       | 220250    | 2n     | ET                  | 1d  |
| HZ05024     | 0502        | 335339               | 138138       | 307307   | 265269    | 211211   | 272277       | 374382       | 199199   | 333357       | 250250    | 2n     | TT                  |     |
| HZ05022     | 0502        | 348351357            | 138178       | 307307   | 212232269 | 211223   | 267277283    | 330374376    | 199211   | 311337345    | 220250258 | 3n     | ETT                 | 3t  |
| HZ05023     | 0502        | 346351359            | 138180       | 287287   | 212232    | 211231   | 272280326    | 330366378    | 199215   | 307335343    | 218252268 | 3n     | ETN                 | 4t  |
| HZ05037     | 0503        | 348348               | 138138       | 307307   | 269269    | 211231   | 272272       | 370378       | 199199   | 333335       | 250264    | 2n     | TT                  |     |
| HZ05031     | 0503        | 346351359            | 138180       | 287287   | 212232    | 211231   | 272280326    | 330366378    | 199215   | 307335343    | 218252268 | 3n     | ETN                 | 4t  |
| HZ05032     | 0503        | 346351359            | 138180       | 287287   | 212232    | 211231   | 272280326    | 330366378    | 199215   | 307335343    | 218252268 | 3n     | ETN                 | 4t  |
| HZ050310    | 0503        | 346351367            | 138180       | 287287   | 212232    | 211231   | 272280330    | 330366378    | 199215   | 307335343    | 218256268 | 3n     | ETN                 | 5t  |
| HZ05035     | 0503        | 309351               | 138186       | 287307   | 212269277 | 211223   | 284301326    | 330366374    | 199215   | 307315337    | 218252268 | 3n     | ETT                 | 6t  |
| HZ05036     | 0503        | 309351               | 138186       | 287307   | 212269277 | 211223   | 284301326    | 330366374    | 199215   | 307315337    | 218252268 | 3n     | ETT                 | 6t  |
| HZ050311    | 0503        | 346351359            | 138180       | 287307   | 212232    | 211231   | 268272280326 | 330366370378 | 199215   | 307335343353 | 218252268 | 4n     | ETTN                | 3te |
| HZ05038     | 0503        | 346355359            | 138180       | 287312   | 212232269 | 211231   | 272276280326 | 330366370378 | 199215   | 307335343353 | 218252268 | 4n     | ETTN                | 4te |
| HZ05061     | 0506        | 313353               | 138170188    | 302302   | 212232    | 211223   | 277296       | 330376       | 199211   | 303311345    | 218220258 | 3n     | EET                 | 7t  |
| HZ050716    | 0507        | 342376               | 188188       | 000000   | 212212    | 223239   | 275275       | 330330       | 211211   | 303303       | 218218    | 2n     | EE                  |     |
| HZ050717    | 0507        | 353376               | 178188       | 000000   | 212212    | 239239   | 261296       | 330330       | 211211   | 303309       | 218218    | 2n     | EE                  |     |
| HZ05072     | 0507        | 353376               | 170176       | 000000   | 212212    | 239239   | 267296       | 330330       | 211211   | 303303       | 216218    | 2n     | EE                  |     |
| HZ05073     | 0507        | 376376               | 178188       | 000000   | 212212    | 223239   | 296296       | 330330       | 211211   | 303309       | 218220    | 2n     | EE                  |     |
| HZ05074     | 0507        | 353361               | 164164       | 000000   | 212212    | 223223   | 263274       | 330330       | 211211   | 303311       | 218220    | 2n     | EE                  |     |
| HZ05075     | 0507        | 353353               | 178188       | 000000   | 212212    | 239239   | 263296       | 330330       | 211211   | 303303       | 216218    | 2n     | EE                  |     |
| HZ05076     | 0507        | 353353               | 164178       | 000000   | 212212    | 223239   | 275296       | 330330       | 211211   | 309311       | 218218    | 2n     | EE                  |     |
| HZ05077     | 0507        | 342353               | 178188       | 000000   | 212212    | 223239   | 263296       | 330330       | 211211   | 303303       | 218218    | 2n     | EE                  |     |
| HZ05078     | 0507        | 357357               | 164178       | 000000   | 212212    | 223239   | 263296       | 330330       | 211211   | 303309       | 218218    | 2n     | EE                  |     |
| HZ05071     | 0507        | 313351353            | 138170188    | 302302   | 212232    | 211223   | 277296       | 330376       | 199211   | 303311345    | 218220258 | 3n     | EET                 | 1t  |
| HZ050713    | 0507        | 313351353            | 138170188    | 302302   | 212232    | 211223   | 277296       | 330376       | 199211   | 303311345    | 218220258 | 3n     | EET                 | 1t  |
| HZ050714    | 0507        | 313351353            | 138170188    | 302302   | 212232    | 211223   | 277296       | 330376       | 199211   | 303311345    | 218220258 | 3n     | EET                 | 1t  |
| HZ050710    | 0507        | 313353               | 138170188    | 302302   | 212232    | 211223   | 277296       | 330376       | 199211   | 303311345    | 218220258 | 3n     | EET                 | 7t  |

|          |      |              |              |        |        |              |              |           |           |           |           |    |       |      |
|----------|------|--------------|--------------|--------|--------|--------------|--------------|-----------|-----------|-----------|-----------|----|-------|------|
| HZ050711 | 0507 | 313353355    | 138170188    | 302302 | 212232 | 211223       | 277296       | 330376    | 199211    | 303311345 | 218220258 | 3n | EET   | 8t   |
| HZ050715 | 0507 | 309346351    | 138180186    | 287287 | 212232 | 211223231    | 280284326    | 330366    | 215219    | 303307315 | 218268    | 3n | EEN   | 9t   |
| HZ050712 | 0507 | 313351353357 | 138170178188 | 302302 | 212232 | 211223239    | 267277296    | 330376    | 199211    | 303311345 | 218220258 | 4n | EEET  | 5te  |
| HZ050718 | 0507 | 313351353    | 138170188    | 302302 | 212232 | 211223       | 277296       | 330376    | 199211    | 303311345 | 218220258 | 4n | EEET  | 6te  |
| HZ05079  | 0507 | 313351353357 | 138164170188 | 302302 | 212232 | 211223       | 275277296    | 330332376 | 199211    | 303311345 | 218220258 | 4n | EEET  | 7te  |
| RQ107    | 0507 | 313351353    | 138170188    | 302302 | 212232 | 211223239    | n.a.         | 330376    | 199211    | 303311345 | 218220258 | 3n | EET   | 101t |
| RQ121    | 0507 | 313351353    | 138170188    | 302302 | 212232 | 211223239    | n.a.         | 330376    | 199211    | 303311345 | 218220258 | 3n | EET   | 101t |
| HZ05081  | 0508 | 353353       | 158164       | 000000 | 212212 | 223239       | 275275       | 330330    | 211211    | 303311    | 218218    | 2n | EE    |      |
| HZ05082  | 0508 | 353373       | 164176       | 000000 | 212212 | 223239       | 275296       | 330330    | 211211    | 303309    | 216220    | 2n | EE    |      |
| HZ05083  | 0508 | 357357       | 178178       | 000000 | 212212 | 223239       | 265300       | 330330    | 211211    | 303305    | 216216    | 2n | EE    |      |
| HZ05084  | 0508 | 353353       | 164178       | 000000 | 212212 | 239239       | 263300       | 332332    | 211211    | 303309    | 216216    | 2n | EE    |      |
| HZ05085  | 0508 | 353380       | 178188       | 000000 | 212212 | 223223       | 265284       | 330332    | 211211    | 303311    | 216220    | 2n | EE    |      |
| HZ05086  | 0508 | 342353       | 170178       | 000000 | 212212 | 223239       | 275296       | 330330    | 211211    | 309309    | 218220    | 2n | EE    |      |
| HZ050910 | 0509 | 342357       | 164178       | 000000 | 212212 | 239239       | 261296       | 330330    | 211211    | 303311    | 216218    | 2n | EE    |      |
| HZ050911 | 0509 | 353353       | 160178       | 000000 | 212212 | 239239       | 261267       | 330330    | 211211    | 309311    | 216216    | 2n | EE    |      |
| HZ050912 | 0509 | 353353       | 164188       | 000000 | 212212 | 223223       | 275284       | 330330    | 211211    | 309313    | 216218    | 2n | EE    |      |
| HZ05094  | 0509 | 353353       | 160178       | 000000 | 212212 | 239239       | 267302       | 330330    | 211211    | 303309    | 218218    | 2n | EE    |      |
| HZ05095  | 0509 | 353380       | 178188       | 000000 | 212212 | 239239       | 267274       | 330330    | 211211    | 303309    | 216218    | 2n | EE    |      |
| HZ05097  | 0509 | 353365       | 164188       | 000000 | 212212 | 223239       | 261300       | 330330    | 211211    | 303309    | 218220    | 2n | EE    |      |
| HZ05099  | 0509 | 357361       | 178178       | 000000 | 212212 | 223239       | 275284       | 330332    | 211211    | 303311    | 218218    | 2n | EE    |      |
| HZ05091  | 0509 | 313351353    | 138170188    | 302302 | 212232 | 211223       | 277296       | 330376    | 199211    | 303311345 | 218220258 | 3n | EET   | 1t   |
| HZ05093  | 0509 | 309346351    | 138180186    | 287287 | 212232 | 211223231    | 280284326    | 330366    | 215219    | 303307315 | 218268    | 3n | EEN   | 9t   |
| HZ050913 | 0509 | 309344350    | 138180186    | 287287 | 212232 | 211223231    | 280284326    | 330366    | 215219    | 303307313 | 218278    | 3n | EEN   | 10t  |
| HZ05096  | 0509 | 313353       | 138170188    | 302302 | 212232 | 211223       | 277286296    | 330376    | 199211    | 303311345 | 218220258 | 3n | EET   | 11t  |
| HZ05092  | 0509 | 309346351357 | 138180186    | 287287 | 212232 | 211223231239 | 261280284326 | 330332366 | 211215219 | 307309315 | 218268    | 4n | EENN* | 8te  |
| HZ05098  | 0509 | 313353       | 138170178188 | 302302 | 212232 | n.a.         | n.a.         | n.a.      | 199211    | 303311345 | 218220262 | 4n | EEET* | 9te  |
| HZ051023 | 0510 | 313351353    | 138170188    | 302302 | 212232 | 211223       | 277296       | 330376    | 199211    | 303311345 | 218220258 | 3n | EET   | 1t   |
| HZ05106  | 0510 | 313351353    | 138170188    | 302302 | 212232 | 211223       | 277296       | 330376    | 199211    | 303311345 | 218220258 | 3n | EET   | 1t   |
| HZ05102  | 0510 | 313353       | 138170188    | 302302 | 212232 | 211223       | 277296       | 330376    | 199211    | 303311345 | 218220258 | 3n | EET   | 7t   |
| HZ05101  | 0510 | 313351353    | 138170188    | 302302 | 212232 | 211223       | 277296       | 330376    | 199211    | 303311345 | 218220262 | 3n | EET   | 12t  |
| HZ051011 | 0510 | 313351353    | 138170188    | 302302 | 212232 | 211223       | 277296       | 330376    | 199211    | 303311345 | 218220262 | 3n | EET   | 12t  |
| HZ051015 | 0510 | 313351353    | 138170188    | 302302 | 212232 | 211223       | 277296       | 330376    | 199211    | 303311345 | 218220262 | 3n | EET   | 12t  |
| HZ051017 | 0510 | 313351353    | 138170188    | 302302 | 212232 | 211223       | 277296       | 330376    | 199211    | 303311345 | 218220262 | 3n | EET   | 12t  |
| HZ051020 | 0510 | 313351353    | 138170188    | 302302 | 212232 | 211223       | 277296       | 330376    | 199211    | 303311345 | 218220262 | 3n | EET   | 12t  |
| HZ05104  | 0510 | 313351353    | 138170188    | 302302 | 212232 | 211223       | 277296       | 330376    | 199211    | 303311345 | 218220262 | 3n | EET   | 12t  |
| HZ051012 | 0510 | 309346351    | 138180186    | 287287 | 212232 | 211223231    | 280284326    | 330366    | 215219    | 303307315 | 218268    | 3n | EEN   | 9t   |

|          |      |              |              |        |        |              |              |           |           |              |           |    |       |      |
|----------|------|--------------|--------------|--------|--------|--------------|--------------|-----------|-----------|--------------|-----------|----|-------|------|
| HZ051018 | 0510 | 309346351    | 138180186    | 287287 | 212232 | 211223231    | 280284326    | 330366    | 215219    | 303307315    | 218268    | 3n | EEN   | 9t   |
| HZ051022 | 0510 | 309346351    | 138180186    | 287287 | 212232 | 211223231    | 280284326    | 330366    | 215219    | 303307315    | 218268    | 3n | EEN   | 9t   |
| HZ051025 | 0510 | 309346351    | 138180186    | 287287 | 212232 | 211223231    | 280284326    | 330366    | 215219    | 303307315    | 218268    | 3n | EEN   | 9t   |
| HZ05105  | 0510 | 309346351    | 138180186    | 287287 | 212232 | 211223231    | 280284326    | 330366    | 215219    | 303307315    | 218268    | 3n | EEN   | 9t   |
| HZ05108  | 0510 | 309346351    | 138180186    | 287287 | 212232 | 211223231    | 280284326    | 330366    | 215219    | 303307315    | 218268    | 3n | EEN   | 9t   |
| HZ051013 | 0510 | 309346348    | 138180186    | 287287 | 212232 | 211223231    | 280284326    | 330366    | 215219    | 303307315    | 218268    | 3n | EEN   | 13t  |
| HZ051016 | 0510 | 309344350    | 138180186    | 287307 | 212232 | 211223231    | 280284326    | 330366    | 215219    | 303307313    | 218268    | 3n | EEN   | 14t  |
| HZ051021 | 0510 | 336346351    | 138180       | 307307 | 212232 | 2112231      | 272280326    | 330366374 | 199215    | 307341       | 218252    | 3n | ETN   | 15t  |
| HZ05103  | 0510 | 313353       | 138170188    | 302302 | 212232 | 211223239    | 277296       | 330376    | 199211    | 303311345    | 218220258 | 3n | EET   | 16t  |
| HZ051010 | 0510 | 309342346351 | 138164180186 | 287287 | 212232 | 211223231239 | 267280284326 | 330366    | 211215219 | 303307309315 | 218220268 | 4n | EEEN  | 10te |
| HZ051014 | 0510 | 309346351376 | 138164180186 | 287287 | 212232 | 211223231239 | 274280284330 | 330366    | 211215219 | 303305307315 | 218268    | 4n | EEEN  | 11te |
| HZ051019 | 0510 | 309346351369 | 138180186    | 287287 | 212232 | 211223231239 | 280284326    | 330366    | 211215219 | 303307315    | 218268    | 4n | EEEN* | 12te |
| HZ051024 | 0510 | 309346351373 | n.a.         | n.a.   | n.a.   | 211223231    | 265280284326 | 330366    | n.a.      | n.a.         | n.a.      | 4n | EEEN* | 13te |
| HZ05109  | 0510 | 313342351353 | 138170188    | 302302 | 212232 | 211223239    | 277296       | 330376    | 199211    | 303309311345 | 218220258 | 4n | EEET  | 14te |
| HZ051102 | 0511 | 342353       | 170176       | 000000 | 212212 | 223239       | 267296       | 330330    | 211211    | 303311       | 218218    | 2n | EE    |      |
| HZ051103 | 0511 | 350353       | 164178       | 000000 | 212212 | 223223       | 267275       | 330330    | 211211    | 303311       | 218218    | 2n | EE    |      |
| HZ051104 | 0511 | 357357       | 178180       | 000000 | 212212 | 239239       | 261275       | 330330    | 211211    | 303303       | 218218    | 2n | EE    |      |
| HZ051110 | 0511 | 353357       | 178188       | 000000 | 212212 | 239239       | 296296       | 330332    | 211211    | 303303       | 218218    | 2n | EE    |      |
| HZ051113 | 0511 | 346350       | 158176       | 000000 | 212212 | 223223       | 275296       | 330330    | 211211    | 303303       | 218218    | 2n | EE    |      |
| HZ051114 | 0511 | 346357       | 164176       | 000000 | 212212 | 223239       | 275296       | 330330    | 211211    | 303303       | 218220    | 2n | EE    |      |
| HZ051101 | 0511 | 309346351    | 138180186    | 287287 | 212232 | 211223231    | 280284326    | 330366    | 215219    | 303307315    | 218268    | 3n | EEN   | 9t   |
| HZ051105 | 0511 | 309346351    | 138180186    | 287287 | 212232 | 211223231    | 280284326    | 330366    | 215219    | 303307315    | 218268    | 3n | EEN   | 9t   |
| HZ051108 | 0511 | 309346351    | 138180186    | 287287 | 212232 | 211223231    | 280284326    | 330366    | 215219    | 303307315    | 218268    | 3n | EEN   | 9t   |
| HZ051109 | 0511 | 309346351    | 138180186    | 287287 | 212232 | 211223231    | 280284326    | 330366    | 215219    | 303307315    | 218268    | 3n | EEN   | 9t   |
| HZ051111 | 0511 | 309346351    | 138180186    | 287287 | 212232 | 211223231    | 280284326    | 330366    | 215219    | 303307315    | 218268    | 3n | EEN   | 9t   |
| HZ051106 | 0511 | 309346351    | 138180186    | 287287 | 212232 | 211223231    | 280284328    | 330366    | 215219    | 303307315    | 218268    | 3n | EEN   | 17t  |
| HZ051107 | 0511 | 309346351    | 138178180186 | 287287 | 212232 | 211223231    | 280284326    | 330366    | 215219    | 303307315    | 218268    | 4n | EEEN  | 15te |
| HZ051310 | 0513 | 355355       | 138138       | 287292 | 232269 | 211231       | 272274       | 376378    | 199199    | 329353       | 250266    | 2n | TT    |      |
| HZ051311 | 0513 | 332363       | 138138       | 287302 | 232269 | 211231       | 274276       | 378386    | 199199    | 341353       | 252254    | 2n | TT    |      |
| HZ051312 | 0513 | 351363       | 138138       | 287287 | 232269 | 231231       | 272274       | 374386    | 199199    | 337353       | 252258    | 2n | TT    |      |
| HZ051313 | 0513 | 348355       | 138138       | 287312 | 232269 | 211231       | 276276       | 370370    | 199199    | 333337       | 258264    | 2n | TT    |      |
| HZ051314 | 0513 | 328355       | 138138       | 287297 | 265269 | 231231       | 276279       | 374378    | 199199    | 329353       | 264266    | 2n | TT    |      |
| HZ051315 | 0513 | 359400       | 138138       | 292307 | 273277 | 211211       | 272274       | 374374    | 199199    | 341353       | 260266    | 2n | TT    |      |
| HZ051316 | 0513 | 355359       | 138138       | 287302 | 232269 | 211231       | 276277       | 360370    | 199199    | 341345       | 246252    | 2n | TT    |      |
| HZ051318 | 0513 | 344344       | 138138       | 287287 | 232232 | 231231       | 272283       | 358374    | 199199    | 337349       | 246266    | 2n | TT    |      |
| HZ051319 | 0513 | 338346       | 138138       | 287307 | 232232 | 211231       | 274276       | 378378    | 199199    | 339351       | 250260    | 2n | TT    |      |

|          |      |              |        |           |           |        |              |              |        |              |              |    |      |      |
|----------|------|--------------|--------|-----------|-----------|--------|--------------|--------------|--------|--------------|--------------|----|------|------|
| HZ05132  | 0513 | 348355       | 138138 | 287287    | 232232    | 211231 | 274276       | 378378       | 199199 | 331337       | 250254       | 2n | TT   |      |
| HZ051320 | 0513 | 328340       | 138138 | 287307    | 232269    | 211231 | 272283       | 374378       | 199199 | 335349       | 254254       | 2n | TT   |      |
| HZ051321 | 0513 | 332344       | 138138 | 287287    | 256269    | 211211 | 274283       | 374380       | 199199 | 341353       | 262264       | 2n | TT   |      |
| HZ051322 | 0513 | 348363       | 138138 | 287287    | 232273    | 231231 | 274291       | 376384       | 199199 | 329333       | 258262       | 2n | TT   |      |
| HZ051323 | 0513 | 348355       | 138138 | 287287    | 232232    | 211231 | 272272       | 374378       | 199199 | 337341       | 248260       | 2n | TT   |      |
| HZ051324 | 0513 | 348348       | 138138 | 287287    | 232232    | 211231 | 276283       | 376380       | 199199 | 331337       | 258264       | 2n | TT   |      |
| HZ051325 | 0513 | 363363       | 138138 | 287287    | 232269    | 211231 | 268276       | 364380       | 199199 | 333349       | 250250       | 2n | TT   |      |
| HZ051326 | 0513 | 355363       | 138138 | 287302    | 232232    | 211211 | 276279       | 370370       | 199199 | 337341       | 260266       | 2n | TT   |      |
| HZ051327 | 0513 | 351363       | 138138 | 287307    | 232232    | 231231 | 274276       | 374378       | 199199 | 333333       | 252264       | 2n | TT   |      |
| HZ051328 | 0513 | 328355       | 138138 | 287287    | 232232    | 211231 | 274276       | 378386       | 199199 | 333333       | 250250       | 2n | TT   |      |
| HZ051329 | 0513 | 328340       | 138138 | 287307    | 232269    | 231231 | 277279       | 374384       | 199199 | 325349       | 246264       | 2n | TT   |      |
| HZ05133  | 0513 | 339359       | 138138 | 287297    | 232269    | 231231 | 274276       | 374374       | 199199 | 337341       | 258264       | 2n | TT   |      |
| HZ051330 | 0513 | 328332       | 138138 | 287287    | 232232    | 211231 | 272276       | 374378       | 199199 | 341349       | 250266       | 2n | TT   |      |
| HZ051331 | 0513 | 332344       | 138138 | 287292    | 232269    | 211231 | 274276       | 370382       | 199199 | 333341       | 250254       | 2n | TT   |      |
| HZ051332 | 0513 | 351359       | 138138 | 287287    | 232269    | 211231 | 272279       | 380382       | 199199 | 339349       | 250250       | 2n | TT   |      |
| HZ051333 | 0513 | 336363       | 138138 | 287287    | 232232    | 211231 | 272276       | 374380       | 199199 | 333353       | 258264       | 2n | TT   |      |
| HZ051334 | 0513 | 336336       | 138138 | 287302    | 232232    | 231231 | 270274       | 384384       | 199199 | 333347       | 250252       | 2n | TT   |      |
| HZ051336 | 0513 | 340359       | 138138 | 287287    | 232232    | 211211 | 272276       | 374382       | 199199 | 333349       | 248250       | 2n | TT   |      |
| HZ051337 | 0513 | 348382       | 138138 | 287287    | 232273    | 211211 | 272274       | 378382       | 199199 | 353353       | 250258       | 2n | TT   |      |
| HZ05134  | 0513 | 344351       | 138138 | 287312    | 232232    | 211211 | 272272       | 374374       | 199199 | 337345       | 250252       | 2n | TT   |      |
| HZ05135  | 0513 | 319331       | 138138 | 292302    | 232269    | 211231 | 272276       | 378380       | 199199 | 341343       | 250252       | 2n | TT   |      |
| HZ05136  | 0513 | 348351       | 138138 | 287287    | 232232    | 211231 | 272276       | 380386       | 199199 | 337353       | 252262       | 2n | TT   |      |
| HZ05137  | 0513 | 320336       | 138138 | 287312    | 232232    | 211231 | 272276       | 374380       | 199199 | 333341       | 258262       | 2n | TT   |      |
| HZ05138  | 0513 | 336398       | 138138 | 287302    | 232232    | 211231 | 274276       | 378382       | 199199 | 337349       | 250260       | 2n | TT   |      |
| HZ05131  | 0513 | 313351       | 138188 | 287307    | 212232    | 211223 | 272274296    | 330364376    | 199211 | 311333345    | 218250258    | 3n | ETT  | 18t  |
| HZ05154  | 0515 | 351369       | 138164 | 287287    | 212232    | 211223 | 272296       | 330376       | 199211 | 311341       | 218252       | 2n | ET   | 2d   |
| HZ05157  | 0515 | 336340       | 138138 | 307317    | 232273    | 211211 | 279285       | 370374       | 199199 | 347353       | 252268       | 2n | TT   |      |
| HZ05158  | 0515 | 340367       | 138138 | 307312    | 232232    | 211211 | 272272       | 374378       | 199199 | 339357       | 250252       | 2n | TT   |      |
| HZ05151  | 0515 | 346355382    | 138180 | 287302    | 212232    | 211223 | 272284328    | 330366374    | 199215 | 307315353    | 218252268    | 3n | ETN  | 19t  |
| HZ05152  | 0515 | 340350380    | 138180 | 287302    | 212232    | 211223 | 272284326    | 330366374    | 199216 | 305311347    | 218254270    | 3n | ETN  | 20t  |
| HZ05156  | 0515 | 340350380    | 138180 | 287302    | 212232    | 211223 | 272284326    | 330366374    | 199216 | 305311347    | 218254270    | 3n | ETN  | 20t  |
| HZ05153  | 0515 | 344346351    | 138180 | 287312    | 212232273 | 211231 | 276284326    | 330366378    | 199215 | 303335345    | 218252268    | 3n | ETN  | 21t  |
| HZ05159  | 0515 | 351359369    | 138164 | 287307    | 212232    | 211223 | 272296       | 330376378    | 199211 | 311329341    | 218250252    | 3n | ETT  | 22t  |
| HZ05155  | 0515 | 336346355382 | 138180 | 287302307 | 212232265 | 211223 | 272274284328 | 330366374376 | 199215 | 307315333353 | 218250252268 | 4n | ETT* | 16te |
| HZ51510  | 0515 | 346351371    | 138180 | 287307    | 212232273 | 211231 | 277280326    | 330366378    | 199219 | 307315347    | 218250260    | 3n | ETN  | 40t  |
| HZ06011  | 0601 | 346355382    | 138180 | 287302    | 212232    | 211223 | 272284326    | 330366374    | 199215 | 307315353    | 218252268    | 3n | ETN  | 23t  |

|          |      |           |        |        |           |           |           |           |        |           |           |    |     |     |
|----------|------|-----------|--------|--------|-----------|-----------|-----------|-----------|--------|-----------|-----------|----|-----|-----|
| HZ07041  | 0601 | 351369    | 138164 | 287287 | 212232    | 211223    | 272296    | 330376    | 199211 | 311341    | 218252    | 2n | ET  | 2d  |
| HZ070411 | 0601 | 351369    | 138164 | 287287 | 212232    | 211223    | 272296    | 330376    | 199211 | 311341    | 218252    | 2n | ET  | 2d  |
| HZ070412 | 0601 | 351369    | 138164 | 287287 | 212232    | 211223    | 272296    | 330376    | 199211 | 311341    | 218252    | 2n | ET  | 2d  |
| HZ070413 | 0601 | 351369    | 138164 | 287287 | 212232    | 211223    | 272296    | 330376    | 199211 | 311341    | 218252    | 2n | ET  | 2d  |
| HZ070415 | 0601 | 351369    | 138164 | 287287 | 212232    | 211223    | 272296    | 330376    | 199211 | 311341    | 218252    | 2n | ET  | 2d  |
| HZ070422 | 0601 | 351369    | 138164 | 287287 | 212232    | 211223    | 272296    | 330376    | 199211 | 311341    | 218252    | 2n | ET  | 2d  |
| HZ070423 | 0601 | 351369    | 138164 | 287287 | 212232    | 211223    | 272296    | 330376    | 199211 | 311341    | 218252    | 2n | ET  | 2d  |
| HZ070427 | 0601 | 351369    | 138164 | 287287 | 212232    | 211223    | 272296    | 330376    | 199211 | 311341    | 218252    | 2n | ET  | 2d  |
| HZ070431 | 0601 | 351369    | 138164 | 287287 | 212232    | 211223    | 272296    | 330376    | 199211 | 311341    | 218252    | 2n | ET  | 2d  |
| HZ070434 | 0601 | 351369    | 138164 | 287287 | 212232    | 211223    | 272296    | 330376    | 199211 | 311341    | 218252    | 2n | ET  | 2d  |
| HZ070436 | 0601 | 351369    | 138164 | 287287 | 212232    | 211223    | 272296    | 330376    | 199211 | 311341    | 218252    | 2n | ET  | 2d  |
| HZ070437 | 0601 | 351369    | 138164 | 287287 | 212232    | 211223    | 272296    | 330376    | 199211 | 311341    | 218252    | 2n | ET  | 2d  |
| HZ070442 | 0601 | 351369    | 138164 | 287287 | 212232    | 211223    | 272296    | 330376    | 199211 | 311341    | 218252    | 2n | ET  | 2d  |
| HZ070443 | 0601 | 351369    | 138164 | 287287 | 212232    | 211223    | 272296    | 330376    | 199211 | 311341    | 218252    | 2n | ET  | 2d  |
| HZ070445 | 0601 | 351369    | 138164 | 287287 | 212232    | 211223    | 272296    | 330376    | 199211 | 311341    | 218252    | 2n | ET  | 2d  |
| HZ070449 | 0601 | 351369    | 138164 | 287287 | 212232    | 211223    | 272296    | 330376    | 199211 | 311341    | 218252    | 2n | ET  | 2d  |
| HZ07045  | 0601 | 351369    | 138164 | 287287 | 212232    | 211223    | 272296    | 330376    | 199211 | 311341    | 218252    | 2n | ET  | 2d  |
| HZ070450 | 0601 | 351369    | 138164 | 287287 | 212232    | 211223    | 272296    | 330376    | 199211 | 311341    | 218252    | 2n | ET  | 2d  |
| HZ07046  | 0601 | 351369    | 138164 | 287287 | 212232    | 211223    | 272296    | 330376    | 199211 | 311341    | 218252    | 2n | ET  | 2d  |
| HZ07048  | 0601 | 351369    | 138164 | 287287 | 212232    | 211223    | 272296    | 330376    | 199211 | 311341    | 218252    | 2n | ET  | 2d  |
| HZ07044  | 0601 | 351373    | 138164 | 287287 | 212232    | 211223    | 272296    | 330376    | 199211 | 311341    | 218252    | 2n | ET  | 13d |
| HZ070447 | 0601 | 351373    | 138164 | 287287 | 212232    | 211223    | 272296    | 330376    | 199211 | 311341    | 218252    | 2n | ET  | 13d |
| HZ070416 | 0601 | 350367    | 138164 | 287287 | 212232    | 211223    | 272296    | 330376    | 199211 | 311341    | 218252    | 2n | ET  | 14d |
| HZ070419 | 0601 | 355369    | 138164 | 287287 | 212232    | 211223    | 272296    | 330376    | 199211 | 311341    | 218252    | 2n | ET  | 15d |
| HZ070435 | 0601 | 351369    | 138164 | 287287 | 212232    | 211223    | 268296    | 330376    | 199211 | 311341    | 218252    | 2n | ET  | 17d |
| HZ070433 | 0601 | 340340    | 138138 | 307307 | 232269    | 211231    | 272?      | 370374    | 199199 | 347353    | 250256    | 2n | TT  |     |
| HZ070439 | 0601 | 346355382 | 138180 | 287302 | 212232    | 211223    | 272284326 | 330366374 | 199215 | 307315353 | 218252268 | 3n | ETN | 23t |
| HZ070441 | 0601 | 346355    | 138180 | 287302 | 212232    | 211223    | 272284326 | 330366374 | 199215 | 307315353 | 218252268 | 3n | ETN | 51t |
| HZ07042  | 0601 | 309340351 | 138186 | 287307 | 212269277 | 211223    | 284297326 | 330366374 | 199215 | 307315341 | 218252268 | 3n | ETT | 64t |
| HZ070414 | 0601 | 340351369 | 138164 | 287287 | 212232    | 211223    | 272284296 | 330376378 | 199211 | 311341    | 218250252 | 3n | ETT | 61t |
| HZ070417 | 0601 | 344351353 | 138188 | 307312 | 212232273 | 211239    | 276284296 | 330374376 | 199211 | 303333341 | 218250270 | 3n | ETT | 62t |
| HZ070418 | 0601 | 340369    | 138164 | 287307 | 212232269 | 211223    | 272296    | 330376    | 199211 | 311341343 | 218250252 | 3n | ETT | 63t |
| HZ070426 | 0601 | 332351369 | 138164 | 287307 | 212232    | 211223    | 272277296 | 330374376 | 199211 | 311341353 | 218252    | 3n | ETT | 65t |
| HZ070429 | 0601 | 340351369 | 138164 | 287307 | 212232    | 211223231 | 272296    | 330374376 | 199211 | 311341343 | 218252272 | 3n | ETT | 66t |
| HZ07043  | 0601 | 313332351 | 138170 | 307307 | 212269    | 211223231 | 277283296 | 330374376 | 199211 | 303341    | 218250252 | 3n | ETT | 67t |
| HZ070438 | 0601 | 340351369 | 138164 | 287312 | 212232    | 211223    | 272283296 | 330376380 | 199211 | 311341    | 218250252 | 3n | ETT | 68t |

|           |      |              |        |        |           |           |              |              |        |              |              |    |       |      |
|-----------|------|--------------|--------|--------|-----------|-----------|--------------|--------------|--------|--------------|--------------|----|-------|------|
| HZ070440  | 0601 | 351369       | 138164 | 287307 | 212232    | 211223231 | 272277296    | 330374376    | 199211 | 311341345    | 218250252    | 3n | ETT   | 69t  |
| HZ070446  | 0601 | 348351369    | 138164 | 287307 | 212232    | 211223    | 272287296    | 330370376    | 199211 | 311341345    | 218252268    | 3n | ETT   | 70t  |
| HZ070451  | 0601 | 346351       | 138180 | 287287 | 212232    | 211231    | 272280326    | 330366378    | 199215 | 307336343    | 218252268    | 3n | ETN   | 71t  |
| HZ07047   | 0601 | 344351369    | 138164 | 287307 | 212232    | 211223235 | 272289296    | 330374376    | 199211 | 311333341    | 218250252    | 3n | ETT   | 72t  |
| HZ070420  | 0601 | 344346359363 | 138180 | 287307 | 212232    | n.a.      | n.a.         | n.a.         | 199215 | 307335343353 | 218252264268 | 4n | ETTN* | 17te |
| HZ06021   | 0602 | 351369       | 138164 | 287287 | 212232    | 211223    | 272296       | 330376       | 199211 | 311317341    | 218252       | 3n | ETT   | 24t  |
| HZ06031   | 0603 | 346351363    | 138180 | 287287 | 212232    | 211231    | 272280326    | 330366378    | 199215 | 307335343    | 218252268    | 3n | ETN   | 25t  |
| HZ06032   | 0603 | 346351363    | 138186 | 312327 | 212232269 | 211231    | 272280326    | 330366370    | 199215 | 303315347    | 218250268    | 3n | ETT   | 26t  |
| HZ06042   | 0604 | 351373       | 138164 | 287287 | 212232    | 211223    | 272296       | 330378       | 199211 | 311341       | 218252       | 2n | ET    | 3d   |
| HZ06041   | 0604 | 346355382    | 138180 | 287302 | 212232    | 211223    | 272284326    | 330366374    | 199215 | 307315353    | 218252268    | 3n | ETN   | 23t  |
| HZ06043   | 0604 | 344346351    | 138180 | 287307 | 212232273 | 211231    | 276284326    | 330366378    | 199215 | 303335345    | 218252268    | 3n | ETN   | 27t  |
| HZ060610  | 0606 | 351369       | 138164 | 287287 | 212232    | 211223    | 272296       | 330376       | 199211 | 311341       | 218252       | 2n | ET    | 2d   |
| HZ060611  | 0606 | 351369       | 138164 | 287287 | 212232    | 211223    | 272296       | 330376       | 199211 | 311341       | 218252       | 2n | ET    | 2d   |
| HZ060613b | 0606 | 351369       | 138164 | 287287 | 212232    | 211223    | 272296       | 330376       | 199211 | 311341       | 218252       | 2n | ET    | 2d   |
| HZ060616  | 0606 | 351369       | 138164 | 287287 | 212232    | 211223    | 272296       | 330376       | 199211 | 311341       | 218252       | 2n | ET    | 2d   |
| HZ060618  | 0606 | 351369       | 138164 | 287287 | 212232    | 211223    | 272296       | 330376       | 199211 | 311341       | 218252       | 2n | ET    | 2d   |
| HZ060619  | 0606 | 351369       | 138164 | 287287 | 212232    | 211223    | 272296       | 330376       | 199211 | 311341       | 218252       | 2n | ET    | 2d   |
| HZ06062   | 0606 | 351369       | 138164 | 287287 | 212232    | 211223    | 272296       | 330376       | 199211 | 311341       | 218252       | 2n | ET    | 2d   |
| HZ060624  | 0606 | 351369       | 138164 | 287287 | 212232    | 211223    | 272296       | 330376       | 199211 | 311341       | 218252       | 2n | ET    | 2d   |
| HZ060625  | 0606 | 351369       | 138164 | 287287 | 212232    | 211223    | 272296       | 330376       | 199211 | 311341       | 218252       | 2n | ET    | 2d   |
| HZ060628  | 0606 | 351369       | 138164 | 287287 | 212232    | 211223    | 272296       | 330376       | 199211 | 311341       | 218252       | 2n | ET    | 2d   |
| HZ06063   | 0606 | 351369       | 138164 | 287287 | 212232    | 211223    | 272296       | 330376       | 199211 | 311341       | 218252       | 2n | ET    | 2d   |
| HZ06069   | 0606 | 351369       | 138164 | 287287 | 212232    | 211223    | 272296       | 330376       | 199211 | 311341       | 218252       | 2n | ET    | 2d   |
| HZ060622  | 0606 | 346351363    | 138180 | 287287 | 212232    | 211231    | 272280326    | 330366378    | 199215 | 307335343    | 218252268    | 3n | ETN   | 25t  |
| HZ060613a | 0606 | 351369       | 138164 | 287287 | 212232    | 211223    | 272296       | 330376       | 199211 | 311317341    | 218252       | 3n | ETT   | 24t  |
| HZ060612  | 0606 | 351363369    | 138164 | 287322 | 212232265 | 211223231 | 272296       | 330378       | 199211 | 311341       | 218250252    | 3n | ETT   | 28t  |
| HZ060614  | 0606 | 340350367    | 138164 | 287317 | 212232269 | 211223231 | 272296       | 330376388    | 199211 | 311333341    | 218250252    | 3n | ETT   | 29t  |
| HZ060617  | 0606 | 351355369    | 138164 | 287287 | 212232265 | 211223    | 272283296    | 330368376    | 199211 | 311333341    | 218252       | 3n | ETT   | 30t  |
| HZ060620  | 0606 | 351369371    | 138164 | 287307 | 212232236 | 211223    | 272296       | 330376       | 199211 | 311337341    | 218252       | 3n | ETT   | 31t  |
| HZ060621  | 0606 | 351359369    | 138164 | 287307 | 212232    | 211223    | 272283296    | 330376382    | 199211 | 311335341    | 218252       | 3n | ETT   | 32t  |
| HZ060626  | 0606 | 351369371    | 138164 | 287317 | 212232    | 211223231 | 272296       | 330376382    | 199211 | 311335341    | 218252       | 3n | ETT   | 33t  |
| HZ060627  | 0606 | 351359369    | 138164 | 287287 | 212232    | 211223231 | 272285296    | 330376       | 199211 | 311333341    | 218252       | 3n | ETT   | 34t  |
| HZ06066   | 0606 | 351363369    | 138164 | 287317 | 212232269 | 211223231 | 272289296    | 330374376    | 199211 | 311337341    | 218252260    | 3n | ETT   | 35t  |
| HZ06067   | 0606 | 351359369    | 138164 | 287307 | 212232    | 211223    | 272296       | 330376378    | 199211 | 311333341    | 218252       | 3n | ETT   | 36t  |
| HZ06068   | 0606 | 351359369    | 138164 | 287287 | 212232    | 211223    | 272285296    | 330376       | 199211 | 311333341    | 218250252    | 3n | ETT   | 37t  |
| HZ06061   | 0606 | 331336346351 | 138186 | 307312 | 212232    | 211223    | 268272280326 | 330366380388 | 199219 | 303329341355 | 218252264268 | 4n | ETTN  | 18te |

|          |      |              |        |        |              |           |           |           |        |              |           |    |       |      |
|----------|------|--------------|--------|--------|--------------|-----------|-----------|-----------|--------|--------------|-----------|----|-------|------|
| HZ060623 | 0606 | 351359369371 | 138164 | 287317 | 212232236261 | 211223231 | 272276296 | 330374376 | 199211 | 311337341    | 218252    | 4n | ETTN* | 19te |
| HZ06064  | 0606 | 351363369    | 138164 | 287307 | 212232261    | 211223    | 272285296 | 330376    | 199211 | 311317323341 | 218252    | 4n | ETTN* | 20te |
| HZ06072  | 0607 | 313313       | 138176 | 317317 | 212232       | 211239    | 276296    | 330376    | 199211 | 303357       | 218250    | 2n | ET    | 4d   |
| HZ06075  | 0607 | 334340       | 138164 | 287287 | 212232       | 211239    | 263270    | 330378    | 199211 | 309347       | 216250    | 2n | ET    | 5d   |
| HZ06073  | 0607 | 313344       | 138176 | 307317 | 212232       | 211239    | 272276296 | 330374376 | 199211 | 303345357    | 218250252 | 3n | ETT   | 38t  |
| HZ06074  | 0607 | 351369       | 138164 | 287307 | 216232       | 211239    | 272275279 | 330376    | 199211 | 311335347    | 218252264 | 3n | ETT   | 39t  |
| HZ06082  | 0608 | 313313       | 138176 | 317317 | 212232       | 211239    | 276296    | 330376    | 199211 | 303357       | 218250    | 2n | ET    | 4d   |
| HZ060814 | 0608 | 330351       | 138164 | 287287 | 216232       | 211239    | 272296    | 330376    | 199211 | 311329       | 218252    | 2n | ET    | 6d   |
| HZ060816 | 0608 | 330351       | 138164 | 287287 | 212232       | 211223    | 272274    | 330376    | 199211 | 311341       | 216252    | 2n | ET    | 7d   |
| HZ06086  | 0608 | 351369       | 138164 | 287287 | 216232       | 211239    | 272274    | 330376    | 199211 | 311347       | 218252    | 2n | ET    | 8d   |
| HZ06088  | 0608 | 351369       | 138164 | 287287 | 216232       | 211239    | 272274    | 330376    | 199211 | 311347       | 218252    | 2n | ET    | 8d   |
| HZ06087  | 0608 | 351365       | 138164 | 287287 | 216232       | 211239    | 272274    | 330376    | 199211 | 311347       | 218252    | 2n | ET    | 9d   |
| HZ060819 | 0608 | 324336       | 138138 | 302312 | 232232       | 211211    | 272283    | 374374    | 199199 | 341357       | 250272    | 2n | TT    |      |
| HZ060822 | 0608 | 351363       | 138138 | 302307 | 232232       | 211211    | 274277    | 366378    | 199199 | 345353       | 250266    | 2n | TT    |      |
| HZ060823 | 0608 | 348348       | 138138 | 307317 | 232277       | 211211    | 270285    | 378382    | 199199 | 333335       | 250250    | 2n | TT    |      |
| HZ060811 | 0608 | 346355382    | 138180 | 287302 | 212232       | 211223    | 272284328 | 330366374 | 199215 | 307315353    | 218252268 | 3n | ETN   | 19t  |
| HZ060813 | 0608 | 346355382    | 138180 | 287302 | 212232       | 211223    | 272284328 | 330366374 | 199215 | 307315353    | 218252268 | 3n | ETN   | 19t  |
| HZ060815 | 0608 | 346355382    | 138180 | 287302 | 212232       | 211223    | 272284326 | 330366374 | 199215 | 307315353    | 218252268 | 3n | ETN   | 23t  |
| HZ06083  | 0608 | 340350380    | 138180 | 287302 | 212232       | 211223    | 272284326 | 330366374 | 199216 | 305311347    | 218254270 | 3n | ETN   | 20t  |
| HZ06081  | 0608 | 344346351    | 138180 | 287307 | 212232273    | 211231    | 276284326 | 330366378 | 199215 | 303335345    | 218252268 | 3n | ETN   | 27t  |
| HZ060810 | 0608 | 346351371    | 138180 | 287307 | 212232273    | 211231    | 277280326 | 330366378 | 199219 | 307315347    | 218250260 | 3n | ETN   | 40t  |
| HZ060812 | 0608 | 329336351    | 138164 | 287307 | 216232       | 211239    | 272279296 | 330376382 | 199211 | 311329347    | 218250252 | 3n | ETT   | 41t  |
| HZ060820 | 0608 | 351369       | 138164 | 287287 | 216232277    | 211231239 | 272274    | 330376    | 199211 | 311347353    | 218250252 | 3n | ETT   | 42t  |
| HZ060821 | 0608 | 330351359    | 138164 | 287307 | 216232       | 211239    | 272283296 | 330374376 | 199211 | 311329353    | 218250252 | 3n | ETT   | 43t  |
| HZ060824 | 0608 | 309339351    | 138180 | 287287 | 212232       | 211223    | 280283326 | 330366380 | 199219 | 307343353    | 218252    | 3n | ETN   | 44t  |
| HZ06084  | 0608 | 351367369    | 138164 | 287307 | 212232       | 211223    | 272285296 | 330376378 | 199211 | 311345       | 218252    | 3n | ETT   | 45t  |
| HZ06085  | 0608 | 336346351    | 138186 | 307312 | 212232       | 211223    | 272280328 | 330366388 | 199219 | 303329341    | 218264268 | 3n | ETT   | 46t  |
| HZ06089  | 0608 | 336350351    | 138186 | 307312 | 212232       | 211223    | 272280326 | 330366388 | 199219 | 303329341    | 218264268 | 3n | ETT   | 47t  |
| HZ070110 | 0701 | 351369       | 138164 | 287287 | 212232       | 211223    | 272296    | 330376    | 199211 | 311341       | 218252    | 2n | ET    | 2d   |
| HZ070113 | 0701 | 351369       | 138164 | 287287 | 212232       | 211223    | 272296    | 330376    | 199211 | 311341       | 218252    | 2n | ET    | 2d   |
| HZ070116 | 0701 | 351369       | 138164 | 287287 | 212232       | 211223    | 272296    | 330376    | 199211 | 311341       | 218252    | 2n | ET    | 2d   |
| HZ070119 | 0701 | 351369       | 138164 | 287287 | 212232       | 211223    | 272296    | 330376    | 199211 | 311341       | 218252    | 2n | ET    | 2d   |
| HZ070127 | 0701 | 351369       | 138164 | 287287 | 212232       | 211223    | 272296    | 330376    | 199211 | 311341       | 218252    | 2n | ET    | 2d   |
| HZ070128 | 0701 | 351369       | 138164 | 287287 | 212232       | 211223    | 272296    | 330376    | 199211 | 311341       | 218252    | 2n | ET    | 2d   |
| HZ070144 | 0701 | 351369       | 138164 | 287287 | 212232       | 211223    | 272296    | 330376    | 199211 | 311341       | 218252    | 2n | ET    | 2d   |
| HZ070147 | 0701 | 351369       | 138164 | 287287 | 212232       | 211223    | 272296    | 330376    | 199211 | 311341       | 218252    | 2n | ET    | 2d   |

|          |      |           |        |           |           |        |           |           |        |           |           |    |     |     |
|----------|------|-----------|--------|-----------|-----------|--------|-----------|-----------|--------|-----------|-----------|----|-----|-----|
| HZ07015  | 0701 | 351369    | 138164 | 287287    | 212232    | 211223 | 272296    | 330376    | 199211 | 311341    | 218252    | 2n | ET  | 2d  |
| HZ07012  | 0701 | 351365    | 138164 | 287287    | 212232    | 211223 | 272296    | 330376    | 199211 | 311341    | 218252    | 2n | ET  | 11d |
| HZ070145 | 0701 | 351365    | 138164 | 287287    | 212232    | 211223 | 272296    | 330376    | 199211 | 311341    | 218252    | 2n | ET  | 11d |
| HZ070112 | 0701 | 313351    | 138170 | 307307    | 212269    | 211223 | 277296    | 330376    | 199211 | 303341    | 218252    | 2n | ET  | 10d |
| HZ070117 | 0701 | 313351    | 138170 | 307307    | 212269    | 211223 | 277296    | 330376    | 199211 | 303341    | 218252    | 2n | ET  | 10d |
| HZ070121 | 0701 | 313351    | 138170 | 307307    | 212269    | 211223 | 277296    | 330376    | 199211 | 303341    | 218252    | 2n | ET  | 10d |
| HZ070122 | 0701 | 313351    | 138170 | 307307    | 212269    | 211223 | 277296    | 330376    | 199211 | 303341    | 218252    | 2n | ET  | 10d |
| HZ070123 | 0701 | 313351    | 138170 | 307307    | 212269    | 211223 | 277296    | 330376    | 199211 | 303341    | 218252    | 2n | ET  | 10d |
| HZ070124 | 0701 | 313351    | 138170 | 307307    | 212269    | 211223 | 277296    | 330376    | 199211 | 303341    | 218252    | 2n | ET  | 10d |
| HZ070129 | 0701 | 313351    | 138170 | 307307    | 212269    | 211223 | 277296    | 330376    | 199211 | 303341    | 218252    | 2n | ET  | 10d |
| HZ07013  | 0701 | 313351    | 138170 | 307307    | 212269    | 211223 | 277296    | 330376    | 199211 | 303341    | 218252    | 2n | ET  | 10d |
| HZ070130 | 0701 | 313351    | 138170 | 307307    | 212269    | 211223 | 277296    | 330376    | 199211 | 303341    | 218252    | 2n | ET  | 10d |
| HZ070131 | 0701 | 313351    | 138170 | 307307    | 212269    | 211223 | 277296    | 330376    | 199211 | 303341    | 218252    | 2n | ET  | 10d |
| HZ07014  | 0701 | 313351    | 138170 | 307307    | 212269    | 211223 | 277296    | 330376    | 199211 | 303341    | 218252    | 2n | ET  | 10d |
| HZ070141 | 0701 | 313351    | 138170 | 307307    | 212269    | 211223 | 277296    | 330376    | 199211 | 303341    | 218252    | 2n | ET  | 10d |
| HZ07019  | 0701 | 313351    | 138170 | 307307    | 212269    | 211223 | 277296    | 330376    | 199211 | 303341    | 218252    | 2n | ET  | 10d |
| HZ070126 | 0701 | 351369    | 138164 | 307307    | 212232    | 211223 | 285296    | 330376    | 199211 | 309345    | 218252    | 2n | ET  | 12d |
| HZ070149 | 0701 | 351369    | 138164 | 307307    | 212232    | 211223 | 285296    | 330376    | 199211 | 309345    | 218252    | 2n | ET  | 12d |
| HZ07017  | 0701 | 351369    | 138164 | 307307    | 212232    | 211223 | 285296    | 330376    | 199211 | 309345    | 218252    | 2n | ET  | 12d |
| HZ070136 | 0701 | 332336    | 138138 | 307307    | 232232    | 211211 | 274283    | 378378    | 199199 | 341353    | 250252    | 2n | TT  |     |
| HZ070137 | 0701 | 336336    | 138138 | 307307    | 232273    | 211211 | 272276    | 376380    | 199199 | 333347    | 250250    | 2n | TT  |     |
| HZ070120 | 0701 | 346351359 | 138180 | 287287    | 212232    | 211231 | 272280326 | 330366378 | 199215 | 307335343 | 218252268 | 3n | ETN | 4t  |
| HZ070139 | 0701 | 346351363 | 138180 | 287287    | 212232    | 211231 | 272280326 | 330366378 | 199215 | 307335343 | 218252268 | 3n | ETN | 25t |
| HZ070133 | 0701 | 346355382 | 138180 | 287302    | 212232    | 211223 | 272284326 | 330366374 | 199215 | 307315353 | 218252268 | 3n | ETN | 23t |
| HZ070150 | 0701 | 346355382 | 138180 | 287302    | 212232    | 211223 | 272284326 | 330366374 | 199215 | 307315353 | 218252268 | 3n | ETN | 23t |
| HZ070118 | 0701 | 346351382 | 138180 | 287302    | 212232    | 211223 | 272284326 | 330366370 | 199215 | 307315353 | 218252268 | 3n | ETN | 50t |
| HZ070132 | 0701 | 346351378 | 138180 | 287302    | 212232    | 211223 | 272284326 | 330366374 | 199215 | 307315353 | 218252268 | 3n | ETN | 52t |
| HZ07016  | 0701 | 346355378 | 138180 | 287302    | 212232    | 211223 | 272284326 | 330366374 | 199215 | 307315353 | 218252268 | 3n | ETN | 59t |
| HZ07018  | 0701 | 346351371 | 138180 | 287307    | 212232273 | 211231 | 277280326 | 330366378 | 199219 | 307315347 | 218250260 | 3n | ETN | 40t |
| HZ070111 | 0701 | 309340351 | 138180 | 287287    | 212232    | 211223 | 280283326 | 330366380 | 199219 | 307343353 | 218252    | 3n | ETN | 48t |
| HZ070114 | 0701 | 309340351 | 138180 | 287287    | 212232    | 211223 | 280283326 | 330366380 | 199219 | 307343353 | 218252    | 3n | ETN | 48t |
| HZ070151 | 0701 | 309340351 | 138180 | 287287    | 212232    | 211223 | 280283326 | 330366380 | 199219 | 307343353 | 218252    | 3n | ETN | 48t |
| HZ070115 | 0701 | 334338343 | 138180 | 287302    | 212232    | 211231 | 284289326 | 366378380 | 199219 | 307315341 | 218264268 | 3n | ETN | 49t |
| HZ070125 | 0701 | 346355    | 138180 | 287302    | 212232    | 211223 | 272284326 | 330366374 | 199215 | 307315353 | 218252268 | 3n | ETN | 51t |
| HZ070134 | 0701 | 313336351 | 138170 | 287307314 | 212269273 | 211223 | 277279296 | 330374376 | 199211 | 303341353 | 218250252 | 3n | ETT | 53t |
| HZ070142 | 0701 | 332351369 | 138164 | 307307    | 212232    | 211223 | 272285296 | 330376378 | 199211 | 309345353 | 218250252 | 3n | ETT | 54t |



|          |      |              |        |           |           |        |              |              |        |              |              |    |       |      |
|----------|------|--------------|--------|-----------|-----------|--------|--------------|--------------|--------|--------------|--------------|----|-------|------|
| HZ070143 | 0701 | 346351363    | 138186 | 312327    | 212232    | 211231 | 272280326    | 330366370    | 199215 | 303315347    | 218250268    | 3n | ETT   | 55t  |
| HZ070146 | 0701 | 351359373    | 138164 | 287307    | 212232    | 211223 | 272296       | 330374376    | 199211 | 311325341    | 218252       | 3n | ETT   | 56t  |
| HZ070148 | 0701 | 340351369    | 138164 | 287312    | 212232    | 211223 | 272274296    | 330376378    | 199211 | 311341       | 218250252    | 3n | ETT   | 57t  |
| HZ070152 | 0701 | 309340351    | 138186 | 287307    | 212269277 | 211223 | 284297326    | 330366374    | 199215 | 307315337    | 218252268    | 3n | ETT   | 58t  |
| HZ07071  | 0701 | 336346351    | 138180 | 287317    | 212232265 | 223231 | 277284326    | 330366376    | 199215 | 307339353    | 218250268    | 3n | ETN   | 60t  |
| HZ07011  | 0701 | 336346351374 | 138180 | 287302    | 212232    | 211223 | 272284326    | 330366374376 | 199215 | 307315353    | 218250252268 | 4n | ETTN* | 21te |
| HZ070135 | 0701 | 332346355382 | 138180 | 287302307 | 212232273 | 211223 | 272276284326 | 330366374    | 199215 | 307315333353 | 218252268    | 4n | ETTN  | 22te |
| HZ070138 | 0701 | 336346355382 | 138180 | 287302    | 212232    | 211223 | 271284326    | 330366374378 | 199215 | 307315347353 | 218250252268 | 4n | ETTN* | 23te |
| HZ07021  | 0702 | 351373       | 138164 | 287287    | 212232    | 211223 | 272296       | 330376       | 199211 | 311341       | 218252       | 2n | ET    | 13d  |
| HZ07031  | 0703 | 351369       | 138164 | 287287    | 212232    | 211223 | 272296       | 330376       | 199211 | 311341       | 218252       | 2n | ET    | 2d   |
| HZ070511 | 0705 | 351369       | 138164 | 287287    | 212232    | 211223 | 272296       | 330376       | 199211 | 311341       | 218252       | 2n | ET    | 2d   |
| HZ070515 | 0705 | 357390       | 138164 | 307307    | 212232    | 211239 | 276276       | 330374       | 199211 | 303333       | 216252       | 2n | ET    | 18d  |
| HZ070519 | 0705 | 353355       | 138188 | 307307    | 212232    | 211239 | 283296       | 330376       | 199211 | 303333       | 218250       | 2n | ET    | 19d  |
| HZ070514 | 0705 | 344344       | 138138 | 307312    | 232232    | 211211 | 272272       | 378378       | 199199 | 325353       | 250268       | 2n | TT    |      |
| HZ070522 | 0705 | 332371       | 138138 | 302307    | 232232    | 211231 | 272272       | 382382       | 199199 | 337341       | 264266       | 2n | TT    |      |
| HZ070524 | 0705 | 336336       | 138138 | 307312    | 232269    | 211231 | 272276       | 374378       | 199199 | 345345       | 250252       | 2n | TT    |      |
| HZ070526 | 0705 | 351351       | 138138 | 287302    | 232269    | 211211 | 272277       | 374380       | 199199 | 341353       | 250250       | 2n | TT    |      |
| HZ07054  | 0705 | 336359       | 138138 | 302312    | 232232    | 211211 | 276285       | 374378       | 199199 | 353353       | 264264       | 2n | TT    |      |
| HZ07058  | 0705 | 340351       | 138138 | 307307    | 232232    | 211211 | 272276       | 374378       | 199199 | 341353       | 250252       | 2n | TT    |      |
| HZ070516 | 0705 | 346351363    | 138180 | 287287    | 212232    | 211231 | 272280326    | 330366378    | 199215 | 307335343    | 218252268    | 3n | ETN   | 25t  |
| HZ07055  | 0705 | 346351359    | 138180 | 287287    | 212232    | 211231 | 274280326    | 330366378    | 199215 | 307335343    | 218252268    | 3n | ETN   | 80t  |
| HZ07051  | 0705 | 346355382    | 138180 | 287302    | 212232    | 211223 | 272284326    | 330366374    | 199215 | 307315353    | 218252268    | 3n | ETN   | 23t  |
| HZ070510 | 0705 | 346355382    | 138180 | 287302    | 212232    | 211223 | 272284326    | 330366374    | 199215 | 307315353    | 218252268    | 3n | ETN   | 23t  |
| HZ070517 | 0705 | 346355382    | 138180 | 287302    | 212232    | 211223 | 272284326    | 330366374    | 199215 | 307315353    | 218252268    | 3n | ETN   | 23t  |
| HZ07052  | 0705 | 346355382    | 138180 | 287302    | 212232    | 211223 | 272284326    | 330366374    | 199215 | 307315353    | 218252268    | 3n | ETN   | 23t  |
| HZ07059  | 0705 | 346355382    | 138180 | 287302    | 212232    | 211223 | 272284326    | 330366374    | 199215 | 307315353    | 218252268    | 3n | ETN   | 23t  |
| HZ070521 | 0705 | 346355378    | 138180 | 287302    | 212232    | 211223 | 272284326    | 330366374    | 199215 | 307315353    | 218252268    | 3n | ETN   | 59t  |
| HZ070513 | 0705 | 346355382    | 138180 | 287302    | 212232    | 211223 | 272284326    | 330366374    | 199215 | 307315353    | 218252272    | 3n | ETN   | 74t  |
| HZ070518 | 0705 | 346359378    | 138180 | 287302    | 212232    | 211223 | 272284326    | 330366374    | 199215 | 307315353    | 218252268    | 3n | ETN   | 75t  |
| HZ070520 | 0705 | 340350380    | 138180 | 287302    | 212232    | 211223 | 272284326    | 330366374    | 199216 | 305311347    | 218254269    | 3n | ETN   | 76t  |
| HZ07056  | 0705 | 309340351    | 138186 | 287307    | 212269277 | 211223 | 284297326    | 330366374    | 199215 | 307315337    | 218252268    | 3n | ETT   | 58t  |
| HZ070512 | 0705 | 344350353    | 138180 | 287287    | 212232    | 211231 | 272280326    | 330366378    | 199215 | 307333341    | 218252268    | 3n | ETN   | 73t  |
| HZ070523 | 0705 | 336351369    | 138164 | 287302    | 212232    | 211223 | 272296       | 330376382    | 199211 | 311341       | 218250252    | 3n | ETT   | 77t  |
| HZ070525 | 0705 | 340351369    | 138164 | 287297    | 212232    | 211223 | 272277296    | 330374376    | 199211 | 311341353    | 218252       | 3n | ETT   | 78t  |
| HZ070527 | 0705 | 340351353    | 138188 | 302307    | 212232    | 211239 | 272283296    | 330376       | 199211 | 303333337    | 218250252    | 3n | ETT   | 79t  |
| HZ07053  | 0705 | 346359382    | 138180 | 287302307 | 212232    | 211223 | 272284326    | 330366374380 | 199199 | 307315353    | 218250252268 | 4n | ETTN  | 24te |

|          |      |           |           |        |           |           |              |              |        |           |           |    |      |      |
|----------|------|-----------|-----------|--------|-----------|-----------|--------------|--------------|--------|-----------|-----------|----|------|------|
| HZ070618 | 0706 | 351369    | 138164    | 287287 | 212232    | 211223    | 272296       | 330376       | 199211 | 311341    | 218252    | 2n | ET   | 2d   |
| HZ07065  | 0706 | 367367    | 138138    | 307307 | 269269    | 211211    | 272272       | 380380       | 199199 | 353355    | 248250    | 2n | TT   |      |
| HZ07062  | 0706 | 346351359 | 138180    | 287287 | 212232    | 211231    | 272280326    | 330366378    | 199215 | 307335343 | 218252268 | 3n | ETN  | 4t   |
| HZ070611 | 0706 | 346355382 | 138180    | 287302 | 212232    | 211223    | 272284326    | 330366374    | 199215 | 307315353 | 218252268 | 3n | ETN  | 23t  |
| HZ07064  | 0706 | 346355382 | 138180    | 287302 | 212232    | 211223    | 272284326    | 330366374    | 199215 | 307315353 | 218252268 | 3n | ETN  | 23t  |
| HZ07069  | 0706 | 346355382 | 138180    | 287302 | 212232    | 211223    | 272284326    | 330366374    | 199215 | 307315353 | 218252268 | 3n | ETN  | 23t  |
| HZ070613 | 0706 | 340350380 | 138180    | 287302 | 212232    | 211223    | 272284326    | 330366374    | 199216 | 305311347 | 218254270 | 3n | ETN  | 20t  |
| HZ070610 | 0706 | 309340351 | 138180    | 287287 | 212232    | 211223    | 280283326    | 330366380    | 199219 | 307343353 | 218252    | 3n | ETN  | 48t  |
| HZ070612 | 0706 | 309340351 | 138180    | 287287 | 212232    | 211223    | 280283326    | 330366380    | 199219 | 307343353 | 218252    | 3n | ETN  | 48t  |
| HZ070614 | 0706 | 309340351 | 138180    | 287287 | 212232    | 211223    | 280283326    | 330366380    | 199219 | 307343353 | 218252    | 3n | ETN  | 48t  |
| HZ07066  | 0706 | 309340351 | 138180    | 287287 | 212232    | 211223    | 280283326    | 330366380    | 199219 | 307343353 | 218252    | 3n | ETN  | 48t  |
| HZ070615 | 0706 | 309340348 | 138180    | 287287 | 212232    | 211223    | 280283326    | 330366380    | 199219 | 307343353 | 218252    | 3n | ETN  | 81t  |
| HZ070621 | 0706 | 309338350 | 138180    | 287287 | 212232    | 211223    | 280283326    | 330366380    | 199219 | 307341351 | 218252    | 3n | ETN  | 84t  |
| HZ070616 | 0706 | 309340351 | 138186    | 287307 | 212269277 | 211223    | 284297326    | 330366374    | 199215 | 307315337 | 218252268 | 3n | ETT  | 58t  |
| HZ07067  | 0706 | 309340351 | 138186    | 287307 | 212269277 | 211223    | 284297326    | 330366374    | 199215 | 307315337 | 218252268 | 3n | ETT  | 58t  |
| HZ07068  | 0706 | 309340351 | 138186    | 287307 | 212269277 | 211223    | 284297326    | 330366374    | 199215 | 307315337 | 218252268 | 3n | ETT  | 58t  |
| HZ070619 | 0706 | 309340351 | 138186    | 287307 | 212269277 | 211223    | 284297326    | 330366380    | 199215 | 307315337 | 218252268 | 3n | ETT  | 82t  |
| HZ070620 | 0706 | 346355371 | 138180    | 287287 | 212232    | 211231    | 272280326    | 330366378    | 199215 | 307335343 | 218252268 | 3n | ETT  | 83t  |
| HZ070622 | 0706 | 353373    | 138176188 | 307307 | 212232    | 211223239 | 283296300    | 330376       | 199211 | 303311333 | 218250    | 3n | EET  | 85t  |
| HZ070623 | 0706 | 309340351 | 138138    | 287307 | 212269277 | 211223    | 284297326    | 330366374    | 199215 | 307315337 | 218252268 | 3n | ETT  | 86t  |
| HZ07063  | 0706 | 336351369 | 138164    | 307307 | 212232    | 211223    | 272285296    | 330374376    | 199211 | 309341345 | 218250252 | 3n | ETT  | 87t  |
| HZ07061  | 0706 | 309338350 | 138180    | 287312 | 212232    | 211223    | 272280283326 | 330366380382 | 199219 | 307341351 | 218252272 | 4n | ETT* | 25te |
| HZ080104 | 0801 | 342342    | 176176    | n.a.   | 212212    | 223223    | n.a.         | 330330       | 211211 | 303311    | 218220    | 2n | EE   |      |
| HZ080120 | 0801 | 353353    | 176178    | n.a.   | 212212    | 223239    | n.a.         | 330330       | 211211 | 303303    | 218218    | 2n | EE   |      |
| HZ080133 | 0801 | 342353    | 176176    | n.a.   | 212212    | 223239    | n.a.         | 330330       | 211211 | 309313    | 218220    | 2n | EE   |      |
| HZ080140 | 0801 | 357373    | 164164    | n.a.   | 212212    | 239239    | n.a.         | 330330       | 211211 | 303311    | 218218    | 2n | EE   |      |
| HZ080141 | 0801 | 342353    | 164176    | n.a.   | 212212    | 223239    | n.a.         | 330330       | 211211 | 309311    | 218220    | 2n | EE   |      |
| HZ080143 | 0801 | 342353    | 176178    | n.a.   | 212212    | 223223    | n.a.         | 330330       | 211211 | 303313    | 218218    | 2n | EE   |      |
| HZ080145 | 0801 | 342342    | 176188    | n.a.   | 212212    | 239239    | n.a.         | 330330       | 211211 | 303309    | 218220    | 2n | EE   |      |
| HZ080147 | 0801 | 342353    | 176176    | n.a.   | 212212    | 223239    | n.a.         | 330330       | 211211 | 303303    | 218218    | 2n | EE   |      |
| HZ080148 | 0801 | 353357    | 176176    | n.a.   | 212212    | 223223    | n.a.         | 330330       | 211211 | 303311    | 220220    | 2n | EE   |      |
| HZ080155 | 0801 | 342365    | 176188    | n.a.   | 212212    | 223239    | n.a.         | 330330       | 211211 | 303303    | 218220    | 2n | EE   |      |
| 80130    | 0801 | 313351353 | 138170188 | 302302 | 212232    | 211223    | n.a.         | 330376       | 199211 | 303311345 | 218220258 | 3n | EET  | 1t   |
| 80131    | 0801 | 313351353 | 138170188 | 302302 | 212232    | 211223    | n.a.         | 330376       | 199211 | 303311345 | 218220258 | 3n | EET  | 1t   |
| 80137    | 0801 | 313351353 | 138170188 | 302302 | 212232    | 211223    | n.a.         | 330376       | 199211 | 303311345 | 218220258 | 3n | EET  | 1t   |
| 80144    | 0801 | 313351353 | 138170188 | 302302 | 212232    | 211223    | n.a.         | 330376       | 199211 | 303311345 | 218220258 | 3n | EET  | 1t   |

|          |      |              |              |        |        |              |      |        |           |              |              |    |       |      |
|----------|------|--------------|--------------|--------|--------|--------------|------|--------|-----------|--------------|--------------|----|-------|------|
| 80103    | 0801 | 309346351    | 138180186    | 287287 | 212232 | 211223231    | n.a. | 330366 | 215219    | 303307315    | 218268       | 3n | EEN   | 9t   |
| 80136    | 0801 | 309346351    | 138180186    | 287287 | 212232 | 211223231    | n.a. | 330366 | 215219    | 303307315    | 218268       | 3n | EEN   | 9t   |
| 80101    | 0801 | 313351353    | 138164188    | 302302 | 212232 | 211223239    | n.a. | 330376 | 199211    | 311335       | 218220252    | 3n | EET   | 88t  |
| 80108    | 0801 | 313351353    | 138164188    | 302302 | 212232 | 211223239    | n.a. | 330376 | 199211    | 311335       | 218220252    | 3n | EET   | 88t  |
| 80113    | 0801 | 313351353    | 138164188    | 302302 | 212232 | 211223239    | n.a. | 330376 | 199211    | 311335       | 218220252    | 3n | EET   | 88t  |
| 80114    | 0801 | 313351353    | 138164188    | 302302 | 212232 | 211223239    | n.a. | 330376 | 199211    | 311335       | 218220252    | 3n | EET   | 88t  |
| 80125    | 0801 | 313351353    | 138164188    | 302302 | 212232 | 211223239    | n.a. | 330376 | 199211    | 311335       | 218220252    | 3n | EET   | 88t  |
| 80149    | 0801 | 313351353    | 138164188    | 302302 | 212232 | 211223239    | n.a. | 330376 | 199211    | 311335       | 218220252    | 3n | EET   | 88t  |
| 80151    | 0801 | 313351353    | 138164188    | 302302 | 212232 | 211223239    | n.a. | 330376 | 199211    | 311335       | 218220252    | 3n | EET   | 88t  |
| 80102    | 0801 | 313338351    | 138176188    | 302302 | 212232 | 211223       | n.a. | 330376 | 199211    | 303311335    | 218252       | 3n | EET   | 89t  |
| 80135    | 0801 | 313338351    | 138176188    | 302302 | 212232 | 211223       | n.a. | 330376 | 199211    | 303311335    | 218252       | 3n | EET   | 89t  |
| 80105    | 0801 | 313351353    | 138164188    | 307307 | 212232 | 211223239    | n.a. | 330376 | 199211    | 311335       | 218220252    | 3n | EET   | 90t  |
| 80106    | 0801 | 313351       | 138178188    | 302302 | 212232 | 211223239    | n.a. | 330376 | 199211    | 303311345    | 218252       | 3n | EET   | 91t  |
| 80112    | 0801 | 313351353    | 138178188    | 302302 | 212232 | 211223239    | n.a. | 330376 | 199211    | 303311345    | 218252       | 3n | EET   | 94t  |
| 80126    | 0801 | 313351353    | 138178188    | 302302 | 212232 | 211223239    | n.a. | 330376 | 199211    | 303311345    | 218252       | 3n | EET   | 94t  |
| 80139    | 0801 | 313351353    | 138178188    | 302302 | 212232 | 211223239    | n.a. | 330376 | 199211    | 303311345    | 218252       | 3n | EET   | 94t  |
| 80156    | 0801 | 313351353    | 138178188    | 302302 | 212232 | 211223239    | n.a. | 330376 | 199211    | 303311345    | 218252       | 3n | EET   | 94t  |
| 80158    | 0801 | 313351353    | 138178188    | 302302 | 212232 | 211223239    | n.a. | 330376 | 199211    | 303311345    | 218252       | 3n | EET   | 94t  |
| 80107    | 0801 | 313351353    | 138188       | 302302 | 212232 | 211223       | n.a. | 330376 | 199211    | 303311345    | 218220258    | 3n | EET   | 92t  |
| 80115    | 0801 | 313346382    | 138170186    | 287287 | 212232 | 223223       | n.a. | 330366 | 211219    | 309315       | 216218274    | 3n | EET   | 95t  |
| 80110    | 0801 | 313349382    | 138170186    | 287287 | 212232 | 223223       | n.a. | 330366 | 211219    | 309315       | 216218274    | 3n | EET   | 93t  |
| 80111    | 0801 | 313349382    | 138170186    | 287287 | 212232 | 223223       | n.a. | 330366 | 211219    | 309315       | 216218274    | 3n | EET   | 93t  |
| 80121    | 0801 | 313349382    | 138170186    | 287287 | 212232 | 223223       | n.a. | 330366 | 211219    | 309315       | 216218274    | 3n | EET   | 93t  |
| 80117    | 0801 | 313351353    | 138178188    | 292292 | 212232 | 211223239    | n.a. | 330376 | 199211    | 303311335    | 218220252    | 3n | EET   | 96t  |
| 80124    | 0801 | 313351353    | 138178188    | 292292 | 212232 | 211223239    | n.a. | 330376 | 199211    | 303311335    | 218220252    | 3n | EET   | 96t  |
| 80132    | 0801 | 313351353    | 138178188    | 292292 | 212232 | 211223239    | n.a. | 330376 | 199211    | 303311335    | 218220252    | 3n | EET   | 96t  |
| 80128    | 0801 | 309346359    | 138180186    | 287287 | 212232 | 211223231    | n.a. | 330366 | 215219    | 303307315    | 218268       | 3n | EET   | 97t  |
| HZ080109 | 0801 | 313342351353 | 138170176188 | 302    | 212232 | 211223239    | n.a. | 330376 | 199211    | 303311313345 | 218220258    | 4n | EEET  | 26te |
| HZ080142 | 0801 | 309346351353 | 138178186    | 287    | 212232 | 211223231239 | n.a. | 330366 | 211215219 | 303307315    | 218268       | 4n | EEEN  | 27te |
| HZ080146 | 0801 | 313351353    | 138164188    | 302    | 212232 | 211223239    | n.a. | 330376 | 199211    | 303311335    | 216218220252 | 4n | EEET  | 28te |
| HZ080150 | 0801 | 309342346351 | 138178186    | 287    | 212232 | 211223231    | n.a. | 330366 | 211215219 | 303307313315 | 218268       | 4n | EEEN* | 29te |
| HZ080152 | 0801 | 309346351353 | 138176180186 | 287    | 212232 | 211223239    | n.a. | 330366 | 211215219 | 303307315    | 218268       | 4n | EEEN* | 30te |
| HZ080153 | 0801 | 313342351353 | 138164176188 | 302    | 212232 | 211223239    | n.a. | 330376 | 199211    | 311335       | 218220252    | 4n | EEET  | 31te |
| HZ080154 | 0801 | 309346351353 | 138180186    | 287    | 212232 | 211223231239 | n.a. | 330366 | 211215219 | 303307315    | 218268       | 4n | EEEN  | 32te |
| HZ080157 | 0801 | 313342351353 | 138164178188 | 302    | 212232 | 211223239    | n.a. | 330376 | 199211    | 303311345    | 218252       | 4n | EEET  | 33te |
| HZ080159 | 0801 | 313342351353 | 138164178188 | 292    | 212232 | 211223239    | n.a. | 330376 | 199211    | 303311335    | 216218220252 | 4n | EEEN  | 34te |

|          |      |              |              |        |           |              |      |           |           |              |              |    |       |      |
|----------|------|--------------|--------------|--------|-----------|--------------|------|-----------|-----------|--------------|--------------|----|-------|------|
| HZ080160 | 0801 | 313342351353 | 138178188    | 292    | 212232    | 211223239    | n.a. | 330376    | 199211    | 303311313335 | 218220252    | 4n | EEET  | 35te |
| 80404    | 0804 | 309346351    | 138180186    | 287287 | 212232    | 211223231    | n.a. | 330366    | 215219    | 303307315    | 218268       | 3n | EEN   | 9t   |
| 80405    | 0804 | 309346351    | 138180186    | 287287 | 212232    | 211223231    | n.a. | 330366    | 215219    | 303307315    | 218268       | 3n | EEN   | 9t   |
| 80406    | 0804 | 309346351    | 138180186    | 287287 | 212232    | 211223231    | n.a. | 330366    | 215219    | 303307315    | 218268       | 3n | EEN   | 9t   |
| 80407    | 0804 | 309346351    | 138180186    | 287287 | 212232    | 211223231    | n.a. | 330366    | 215219    | 303307315    | 218268       | 3n | EEN   | 9t   |
| 80410    | 0804 | 309346355    | 138180186    | 287287 | 212232    | 211223231    | n.a. | 330366    | 215219    | 303307315    | 218268       | 3n | EEN   | 99t  |
| 80411    | 0804 | 309346355    | 138180186    | 287287 | 212232    | 211223231    | n.a. | 330366    | 215219    | 303307315    | 218268       | 3n | EEN   | 99t  |
| 80408    | 0804 | 313351353    | 138170188    | 302302 | 212232    | 211223       | n.a. | 330376    | 199211    | 303311345    | 218220       | 3n | EET   | 98t  |
| 80412    | 0804 | 336349351    | 138186       | 307312 | 212232    | 211223       | n.a. | 330366388 | 199219    | 303333341    | 218264268    | 3n | EET   | 100t |
| HZ080401 | 0804 | 309342346351 | 138176180186 | 287    | 212232    | 211223239    | n.a. | 330366    | 211215219 | 303307315    | 218268       | 4n | EEEN* | 36te |
| HZ080402 | 0804 | 344346351359 | 138180       | 287312 | 212232269 | 211231       | n.a. | 330366378 | 199215    | 307335343345 | 218250252268 | 4n | ETTN* | 37te |
| HZ080403 | 0804 | 346351359    | 138180       | 287307 | 212232    | 211231       | n.a. | 330366378 | 199215    | 307333335343 | 218250252268 | 4n | ETTN* | 38te |
| HZ080409 | 0804 | 309350355    | 138164180186 | 287    | 212232    | 211223231239 | n.a. | 330366    | 215219    | 303307315    | 218268       | 4n | EEEN  | 39te |
| HZ090101 | 0901 | 348378       | 138138       | 287302 | 232232    | 211211       | n.a. | 374374    | 199199    | 353353       | 250252       | 2n | TT    |      |
| HZ090102 | 0901 | 348348       | 138138       | 287307 | 232232    | 211211       | n.a. | 374378    | 199199    | 353353       | 250260       | 2n | TT    |      |
| HZ090301 | 0903 | 340344       | 138138       | 307312 | 232269    | 211231       | n.a. | 378380    | 199199    | 353353       | 248250       | 2n | TT    |      |
| HZ090302 | 0903 | 355367       | 138138       | 307307 | 232269    | 211211       | n.a. | 382382    | 199199    | 333353       | 252252       | 2n | TT    |      |
| HZ090303 | 0903 | 340348       | 138138       | 307312 | 232269    | 231231       | n.a. | 378378    | 199199    | 337353       | 250252       | 2n | TT    |      |
| HZ090304 | 0903 | 344348       | 138138       | 307312 | 232232    | 211211       | n.a. | 378380    | 199199    | 341351       | 250252       | 2n | TT    |      |
| HZ090305 | 0903 | 344344       | 138138       | 312312 | 232269    | 211211       | n.a. | 380380    | 199199    | 357357       | 250256       | 2n | TT    |      |
| HZ090306 | 0903 | 344348       | 138138       | 307307 | 269269    | 211211       | n.a. | 378378    | 199199    | 333357       | 252256       | 2n | TT    |      |
| HZ090307 | 0903 | 340344       | 138138       | 307307 | 256261    | 211211       | n.a. | 374378    | 199199    | 341353       | 252256       | 2n | TT    |      |
| HZ090308 | 0903 | 348367       | 138138       | 312312 | 232232    | 211211       | n.a. | 370370    | 199199    | 351351       | 250264       | 2n | TT    |      |
| HZ090309 | 0903 | 344344       | 138138       | 307317 | 232232    | 211231       | n.a. | 370378    | 199199    | 333353       | 264264       | 2n | TT    |      |
| HZ090310 | 0903 | 336336       | 138138       | 302312 | 232232    | 211231       | n.a. | 378380    | 199199    | 347357       | 252256       | 2n | TT    |      |
| HZ090311 | 0903 | 348348       | 138138       | 307307 | 232273    | 211231       | n.a. | 378380    | 199199    | 353355       | 250252       | 2n | TT    |      |
| HZ090312 | 0903 | 348367       | 138138       | 307312 | 232273    | 211211       | n.a. | 370380    | 199199    | 335355       | 250250       | 2n | TT    |      |
| HZ090313 | 0903 | 340340       | 138138       | 307312 | 232256    | 211231       | n.a. | 370380    | 199199    | 333333       | 250250       | 2n | TT    |      |
| HZ090314 | 0903 | 340355       | 138138       | 307307 | 232269    | 211211       | n.a. | 370374    | 199199    | 333341       | 250252       | 2n | TT    |      |
