# Supplementary material for: Dynamic Formation of Asexual Diploid and Polyploid Lineages: Multilocus Analysis of Cobitis Reveals the Mechanisms Maintaining the Diversity of Clones
Source: PubMed Central journal article supplement (PMC3447977; doi:10.1371/journal.pone.0045384), 2012-09-20
Supplement: pone.0045384.s005.pdf [file pone.0045384.s005.pdf]

**Table S4. Allelic diversity within populations of microsatellite loci for diploid specimens.**

| Locality ID | Locus    | Sample size | No. of Different Alleles | Observed Heterozygosity |
|-------------|----------|-------------|--------------------------|-------------------------|
| 0502        | cota_006 | 2           | 4                        | 1                       |
| 0502        | cota_010 | 2           | 2                        | 0.5                     |
| 0502        | cota_027 | 2           | 1                        | 0                       |
| 0502        | cota_032 | 2           | 4                        | 1                       |
| 0502        | cota_033 | 2           | 2                        | 0.5                     |
| 0502        | cota_037 | 2           | 3                        | 1                       |
| 0502        | cota_041 | 2           | 4                        | 1                       |
| 0502        | cota_068 | 2           | 2                        | 0.5                     |
| 0502        | cota_093 | 2           | 4                        | 1                       |
| 0502        | cota_111 | 2           | 2                        | 0.5                     |
| 0503        | cota_006 | 1           | 1                        | 0                       |
| 0503        | cota_010 | 1           | 1                        | 0                       |
| 0503        | cota_027 | 1           | 1                        | 0                       |
| 0503        | cota_032 | 1           | 1                        | 0                       |
| 0503        | cota_033 | 1           | 2                        | 1                       |
| 0503        | cota_037 | 1           | 1                        | 0                       |
| 0503        | cota_041 | 1           | 2                        | 1                       |
| 0503        | cota_068 | 1           | 1                        | 0                       |
| 0503        | cota_093 | 1           | 2                        | 1                       |
| 0503        | cota_111 | 1           | 2                        | 1                       |
| 0507        | cota_006 | 9           | 5                        | 0.556                   |
| 0507        | cota_010 | 9           | 5                        | 0.778                   |
| 0507        | cota_027 | 0           | 0                        | 0                       |
| 0507        | cota_032 | 9           | 1                        | 0                       |
| 0507        | cota_033 | 9           | 2                        | 0.556                   |
| 0507        | cota_037 | 9           | 6                        | 0.778                   |
| 0507        | cota_041 | 9           | 1                        | 0                       |
| 0507        | cota_068 | 9           | 1                        | 0                       |
| 0507        | cota_093 | 9           | 3                        | 0.556                   |
| 0507        | cota_111 | 9           | 3                        | 0.444                   |
| 0508        | cota_006 | 6           | 5                        | 0.5                     |
| 0508        | cota_010 | 6           | 6                        | 0.833                   |
| 0508        | cota_027 | 0           | 0                        | 0                       |
| 0508        | cota_032 | 6           | 1                        | 0                       |
| 0508        | cota_033 | 6           | 2                        | 0.667                   |
| 0508        | cota_037 | 6           | 6                        | 0.833                   |
| 0508        | cota_041 | 6           | 2                        | 0.167                   |
| 0508        | cota_068 | 6           | 1                        | 0                       |
| 0508        | cota_093 | 6           | 4                        | 0.833                   |
| 0508        | cota_111 | 6           | 3                        | 0.5                     |
| 0509        | cota_006 | 7           | 6                        | 0.571                   |
| 0509        | cota_010 | 7           | 4                        | 0.857                   |
| 0509        | cota_027 | 0           | 0                        | 0                       |
| 0509        | cota_032 | 7           | 1                        | 0                       |
| 0509        | cota_033 | 7           | 2                        | 0.286                   |
| 0509        | cota_037 | 7           | 8                        | 1                       |
| 0509        | cota_041 | 7           | 2                        | 0.143                   |
| 0509        | cota_068 | 7           | 1                        | 0                       |
| 0509        | cota_093 | 7           | 4                        | 1                       |

|      |          |    |    |       |
|------|----------|----|----|-------|
| 0509 | cota_111 | 7  | 3  | 0.571 |
| 0511 | cota_006 | 6  | 5  | 0.833 |
| 0511 | cota_010 | 6  | 7  | 1     |
| 0511 | cota_027 | 0  | 0  | 0     |
| 0511 | cota_032 | 6  | 1  | 0     |
| 0511 | cota_033 | 6  | 2  | 0.333 |
| 0511 | cota_037 | 6  | 4  | 0.833 |
| 0511 | cota_041 | 6  | 2  | 0.167 |
| 0511 | cota_068 | 6  | 1  | 0     |
| 0511 | cota_093 | 6  | 2  | 0.333 |
| 0511 | cota_111 | 6  | 2  | 0.167 |
| 0513 | cota_006 | 33 | 19 | 0.848 |
| 0513 | cota_010 | 33 | 1  | 0     |
| 0513 | cota_027 | 33 | 6  | 0.545 |
| 0513 | cota_032 | 33 | 6  | 0.515 |
| 0513 | cota_033 | 33 | 2  | 0.576 |
| 0513 | cota_037 | 33 | 9  | 0.909 |
| 0513 | cota_041 | 33 | 11 | 0.758 |
| 0513 | cota_068 | 33 | 1  | 0     |
| 0513 | cota_093 | 33 | 14 | 0.909 |
| 0513 | cota_111 | 33 | 10 | 0.879 |
| 0515 | cota_006 | 3  | 5  | 1     |
| 0515 | cota_010 | 3  | 2  | 0.333 |
| 0515 | cota_027 | 3  | 4  | 0.667 |
| 0515 | cota_032 | 3  | 3  | 0.667 |
| 0515 | cota_033 | 3  | 2  | 0.333 |
| 0515 | cota_037 | 3  | 4  | 0.667 |
| 0515 | cota_041 | 3  | 5  | 1     |
| 0515 | cota_068 | 3  | 2  | 0.333 |
| 0515 | cota_093 | 3  | 6  | 1     |
| 0515 | cota_111 | 3  | 4  | 1     |
| 0604 | cota_006 | 1  | 2  | 1     |
| 0604 | cota_010 | 1  | 2  | 1     |
| 0604 | cota_027 | 1  | 1  | 0     |
| 0604 | cota_032 | 1  | 2  | 1     |
| 0604 | cota_033 | 1  | 2  | 1     |
| 0604 | cota_037 | 1  | 2  | 1     |
| 0604 | cota_041 | 1  | 2  | 1     |
| 0604 | cota_068 | 1  | 2  | 1     |
| 0604 | cota_093 | 1  | 2  | 1     |
| 0604 | cota_111 | 1  | 2  | 1     |
| 0606 | cota_006 | 12 | 2  | 1     |
| 0607 | cota_010 | 12 | 2  | 1     |
| 0608 | cota_027 | 12 | 1  | 0     |
| 0609 | cota_032 | 12 | 2  | 1     |
| 0610 | cota_033 | 12 | 2  | 1     |
| 0611 | cota_037 | 12 | 2  | 1     |
| 0612 | cota_041 | 12 | 2  | 1     |
| 0613 | cota_068 | 12 | 2  | 1     |
| 0614 | cota_093 | 12 | 2  | 1     |
| 0615 | cota_111 | 12 | 2  | 1     |
| 0607 | cota_006 | 2  | 3  | 0.5   |
| 0607 | cota_010 | 2  | 3  | 1     |
| 0607 | cota_027 | 2  | 2  | 0     |
| 0607 | cota_032 | 2  | 2  | 1     |
| 0607 | cota_033 | 2  | 2  | 1     |

|      |          |    |    |       |
|------|----------|----|----|-------|
| 0607 | cota_037 | 2  | 4  | 1     |
| 0607 | cota_041 | 2  | 3  | 1     |
| 0607 | cota_068 | 2  | 2  | 1     |
| 0607 | cota_093 | 2  | 4  | 1     |
| 0607 | cota_111 | 2  | 3  | 1     |
| 0608 | cota_006 | 9  | 9  | 0.778 |
| 0608 | cota_010 | 9  | 3  | 0.667 |
| 0608 | cota_027 | 9  | 5  | 0.333 |
| 0608 | cota_032 | 9  | 4  | 0.778 |
| 0608 | cota_033 | 9  | 3  | 0.667 |
| 0608 | cota_037 | 9  | 8  | 1     |
| 0608 | cota_041 | 9  | 6  | 0.889 |
| 0608 | cota_068 | 9  | 2  | 0.667 |
| 0608 | cota_093 | 9  | 10 | 1     |
| 0608 | cota_111 | 9  | 6  | 0.889 |
| 0701 | cota_006 | 29 | 6  | 0.966 |
| 0701 | cota_010 | 29 | 3  | 0.931 |
| 0701 | cota_027 | 29 | 2  | 0     |
| 0701 | cota_032 | 29 | 4  | 0.966 |
| 0701 | cota_033 | 29 | 2  | 0.931 |
| 0701 | cota_037 | 29 | 7  | 1     |
| 0701 | cota_041 | 29 | 4  | 0.966 |
| 0701 | cota_068 | 29 | 2  | 0.931 |
| 0701 | cota_093 | 29 | 8  | 1     |
| 0701 | cota_111 | 29 | 3  | 0.966 |
| 0702 | cota_006 | 1  | 2  | 1     |
| 0702 | cota_010 | 1  | 2  | 1     |
| 0702 | cota_027 | 1  | 1  | 0     |
| 0702 | cota_032 | 1  | 2  | 1     |
| 0702 | cota_033 | 1  | 2  | 1     |
| 0702 | cota_037 | 1  | 2  | 1     |
| 0702 | cota_041 | 1  | 2  | 1     |
| 0702 | cota_068 | 1  | 2  | 1     |
| 0702 | cota_093 | 1  | 2  | 1     |
| 0702 | cota_111 | 1  | 2  | 1     |
| 0703 | cota_006 | 1  | 2  | 1     |
| 0703 | cota_010 | 1  | 2  | 1     |
| 0703 | cota_027 | 1  | 1  | 0     |
| 0703 | cota_032 | 1  | 2  | 1     |
| 0703 | cota_033 | 1  | 2  | 1     |
| 0703 | cota_037 | 1  | 2  | 1     |
| 0703 | cota_041 | 1  | 2  | 1     |
| 0703 | cota_068 | 1  | 2  | 1     |
| 0703 | cota_093 | 1  | 2  | 1     |
| 0703 | cota_111 | 1  | 2  | 1     |
| 0601 | cota_006 | 26 | 7  | 0.962 |
| 0601 | cota_010 | 26 | 2  | 0.962 |
| 0601 | cota_027 | 26 | 2  | 0     |
| 0601 | cota_032 | 26 | 3  | 1     |
| 0601 | cota_033 | 26 | 3  | 1     |
| 0601 | cota_037 | 25 | 3  | 1     |
| 0601 | cota_041 | 26 | 4  | 1     |
| 0601 | cota_068 | 26 | 2  | 0.962 |
| 0601 | cota_093 | 26 | 4  | 1     |
| 0601 | cota_111 | 26 | 4  | 1     |
| 0705 | cota_006 | 9  | 12 | 0.667 |

|      |          |    |   |       |
|------|----------|----|---|-------|
| 0705 | cota_010 | 9  | 3 | 0.333 |
| 0705 | cota_027 | 9  | 4 | 0.556 |
| 0705 | cota_032 | 9  | 3 | 0.556 |
| 0705 | cota_033 | 9  | 4 | 0.556 |
| 0705 | cota_037 | 9  | 6 | 0.667 |
| 0705 | cota_041 | 9  | 6 | 0.778 |
| 0705 | cota_068 | 9  | 2 | 0.333 |
| 0705 | cota_093 | 9  | 8 | 0.778 |
| 0705 | cota_111 | 9  | 7 | 0.778 |
| 0706 | cota_006 | 2  | 3 | 0.5   |
| 0706 | cota_010 | 2  | 2 | 0.5   |
| 0706 | cota_027 | 2  | 2 | 0     |
| 0706 | cota_032 | 2  | 3 | 0.5   |
| 0706 | cota_033 | 2  | 2 | 0.5   |
| 0706 | cota_037 | 2  | 2 | 0.5   |
| 0706 | cota_041 | 2  | 3 | 0.5   |
| 0706 | cota_068 | 2  | 2 | 0.5   |
| 0706 | cota_093 | 2  | 4 | 1     |
| 0706 | cota_111 | 2  | 4 | 1     |
| 0801 | cota_006 | 10 | 5 | 0.7   |
| 0801 | cota_010 | 10 | 4 | 0.5   |
| 0801 | cota_027 | 0  | 0 | 0     |
| 0801 | cota_032 | 10 | 1 | 0     |
| 0801 | cota_033 | 10 | 2 | 0.5   |
| 0801 | cota_037 | 0  | 0 | 0     |
| 0801 | cota_041 | 10 | 1 | 0     |
| 0801 | cota_068 | 10 | 1 | 0     |
| 0801 | cota_093 | 10 | 4 | 0.7   |
| 0801 | cota_111 | 10 | 2 | 0.5   |
| 0901 | cota_006 | 2  | 2 | 0.5   |
| 0901 | cota_010 | 2  | 1 | 0     |
| 0901 | cota_027 | 2  | 3 | 1     |
| 0901 | cota_032 | 2  | 1 | 0     |
| 0901 | cota_033 | 2  | 1 | 0     |
| 0901 | cota_037 | 0  | 0 | 0     |
| 0901 | cota_041 | 2  | 2 | 0.5   |
| 0901 | cota_068 | 2  | 1 | 0     |
| 0901 | cota_093 | 2  | 1 | 0     |
| 0901 | cota_111 | 2  | 3 | 1     |
| 0903 | cota_006 | 14 | 6 | 0.643 |
| 0903 | cota_010 | 14 | 1 | 0     |
| 0903 | cota_027 | 14 | 4 | 0.5   |
| 0903 | cota_032 | 14 | 5 | 0.643 |
| 0903 | cota_033 | 14 | 2 | 0.357 |
| 0903 | cota_037 | 0  | 0 | 0     |
| 0903 | cota_041 | 14 | 5 | 0.643 |
| 0903 | cota_068 | 14 | 1 | 0     |
| 0903 | cota_093 | 14 | 9 | 0.714 |
| 0903 | cota_111 | 14 | 5 | 0.714 |

---
